# Supplementary material for: Urinary Concentrations of 2,4-Dichlorophenol and 2,5-Dichlorophenol in the U.S. Population (National Health and Nutrition Examination Survey, 2003–2010): Trends and Predictors
Source: PubMed Central journal article supplement (PMC3984229; doi:10.1289/ehp.1306816), 2014-01-22
Supplement: ehp.1306816.s001.pdf [file ehp.1306816.s001.pdf]

## **Supplemental Material**

# **Urinary Concentrations of 2,4-Dichlorophenol and 2,5-Dichlorophenol in the U.S. Population (National Health and Nutrition Examination Survey, 2003–2010): Trends and Predictors**

Xiaoyun Ye, Lee-Yang Wong, Xiaoliu Zhou, and Antonia M. Calafat

### **Table of Contents**

|                                                                                                                                                                                                                                                    |             |
|----------------------------------------------------------------------------------------------------------------------------------------------------------------------------------------------------------------------------------------------------|-------------|
| <b>Supplemental Material, Table S1.</b> Urinary concentrations in $\mu\text{g/L}$ of 2,5-DCP (95th CI) stratified by age, sex, and race/ethnicity for NHANES cycles 2003–2004, 2005–2006, 2007–2008, and 2009–2010                                 | <b>p. 2</b> |
| <b>Supplemental Material, Table S2.</b> Urinary concentrations in $\mu\text{g/L}$ of 2,4-DCP (95th CI) stratified by age, sex, and race/ethnicity for NHANES cycles 2003–2004, 2005–2006, 2007–2008, and 2009–2010.                                | <b>p. 3</b> |
| <b>Supplemental Material, Table S3.</b> Creatinine corrected urinary concentrations in $\mu\text{g/g}$ creatinine of 2,5-DCP (95th CI), stratified by age, sex, and race/ethnicity from NHANES cycles 2003–04, 2005–2006, 2007–2008, and 2009–2010 | <b>p. 4</b> |
| <b>Supplemental Material, Table S4.</b> Creatinine corrected urinary concentrations in $\mu\text{g/g}$ creatinine of 2,4-DCP (95th CI), stratified by age, sex, and race/ethnicity from NHANES cycles 2003–04, 2005–2006, 2007–2008, and 2009–2010 | <b>p. 5</b> |
| <b>Supplemental Material Table S5.</b> Observed statistical significance P values for differences between adjusted geometric mean urinary concentrations of 2,4-DCP and 2,5-DCP for various demographic groups                                     | <b>p. 6</b> |
| <b>Supplemental Material Table S6.</b> Weighted distribution of the type of housing by race/ethnicity for NHANES 2003-2004 and 2005-2006                                                                                                           | <b>p. 8</b> |
| <b>Supplemental Material Table S7.</b> Distribution of housing type by family income and race for NHANES 2003–2004 and 2005–2006 cycles                                                                                                            | <b>p. 9</b> |

**Supplemental Material, Table S1.** Urinary concentrations in µg/L of 2,5-DCP (95th CI) stratified by age, sex, and race/ethnicity for NHANES cycles 2003–2004, 2005–2006, 2007–2008, and 2009–2010.

|                       | <b>Survey years</b> | <b>Geometric mean</b>   | <b>50<sup>th</sup> Percentile</b> | <b>75<sup>th</sup> Percentile</b> | <b>90<sup>th</sup> Percentile</b> | <b>95<sup>th</sup> Percentile</b> | <b>Sample size</b> |
|-----------------------|---------------------|-------------------------|-----------------------------------|-----------------------------------|-----------------------------------|-----------------------------------|--------------------|
| Total                 | 03-04               | <b>12.9</b> (10.1,16.3) | <b>10.5</b> (8.00,14.2)           | <b>40.9</b> (29.8,54.7)           | <b>190</b> (133,282)              | <b>705</b> (342,1330)             | 2525               |
|                       | 05-06               | <b>9.55</b> (6.67,13.7) | <b>8.10</b> (5.60,11.5)           | <b>26.4</b> (19.0,36.6)           | <b>111</b> (69.9,166)             | <b>332</b> (175,794)              | 2548               |
|                       | 07-08               | <b>9.04</b> (7.22,11.3) | <b>6.60</b> (5.50,8.30)           | <b>25.7</b> (19.2,34.7)           | <b>131</b> (90.2,222)             | <b>473</b> (296,753)              | 2604               |
|                       | 09-10               | <b>6.10</b> (4.94,7.53) | <b>4.70</b> (3.70,5.90)           | <b>18.4</b> (13.3,26.0)           | <b>101</b> (68.0,146)             | <b>301</b> (168,618)              | 2749               |
| <b>Age group</b>      |                     |                         |                                   |                                   |                                   |                                   |                    |
| 6-11 years            | 03-04               | <b>12.5</b> (8.22,18.9) | <b>9.10</b> (5.60,17.4)           | <b>42.1</b> (21.7,83.9)           | <b>161</b> (111,626)              | <b>928</b> (249,1640)             | 314                |
|                       | 05-06               | <b>10.5</b> (8.29,13.4) | <b>7.80</b> (5.90,10.6)           | <b>28.1</b> (17.8,40.2)           | <b>104</b> (55.4,226)             | <b>336</b> (189,785)              | 356                |
|                       | 07-08               | <b>9.31</b> (6.20,14.0) | <b>6.50</b> (4.60,10.9)           | <b>23.3</b> (12.2,45.6)           | <b>151</b> (61.1,306)             | <b>464</b> (222,934)              | 389                |
|                       | 09-10               | <b>7.19</b> (4.36,11.8) | <b>4.80</b> (2.70,9.90)           | <b>30.4</b> (12.4,50.7)           | <b>146</b> (63.7,368)             | <b>503</b> (103,4940)             | 415                |
| 12-19 years           | 03-04               | <b>16.9</b> (11.1,26.0) | <b>11.5</b> (8.20,20.6)           | <b>49.9</b> (26.8,94.0)           | <b>233</b> (94.5,1060)            | <b>1080</b> (287,3970)            | 722                |
|                       | 05-06               | <b>11.9</b> (8.47,16.8) | <b>9.60</b> (6.40,16.7)           | <b>36.0</b> (22.3,54.4)           | <b>127</b> (89.9,160)             | <b>459</b> (160,894)              | 702                |
|                       | 07-08               | <b>11.3</b> (8.78,14.5) | <b>7.40</b> (6.20,9.10)           | <b>30.1</b> (18.5,52.6)           | <b>193</b> (66.7,448)             | <b>611</b> (254,1560)             | 401                |
|                       | 09-10               | <b>8.01</b> (5.53,11.6) | <b>4.80</b> (3.50,8.80)           | <b>24.9</b> (19.1,42.7)           | <b>191</b> (61.2,368)             | <b>526</b> (243,1140)             | 420                |
| 20 years and older    | 03-04               | <b>12.3</b> (9.97,15.3) | <b>10.4</b> (8.00,14.0)           | <b>40.5</b> (30.1,49.2)           | <b>181</b> (141,250)              | <b>583</b> (316,924)              | 1489               |
|                       | 05-06               | <b>9.12</b> (6.15,13.5) | <b>7.80</b> (5.20,11.5)           | <b>24.9</b> (17.3,35.3)           | <b>110</b> (62.9,183)             | <b>327</b> (159,852)              | 1490               |
|                       | 07-08               | <b>8.71</b> (6.83,11.1) | <b>6.60</b> (5.10,8.70)           | <b>24.6</b> (18.8,34.5)           | <b>124</b> (95.9,186)             | <b>452</b> (286,672)              | 1814               |
|                       | 09-10               | <b>5.75</b> (4.77,6.92) | <b>4.60</b> (3.70,5.70)           | <b>16.9</b> (12.7,23.1)           | <b>88.4</b> (66.4,117)            | <b>266</b> (156,450)              | 1914               |
| <b>Sex</b>            |                     |                         |                                   |                                   |                                   |                                   |                    |
| Males                 | 03-04               | <b>14.9</b> (11.8,18.8) | <b>12.5</b> (9.00,16.5)           | <b>40.5</b> (30.7,54.5)           | <b>152</b> (120,259)              | <b>631</b> (259,1950)             | 1231               |
|                       | 05-06               | <b>12.0</b> (8.55,16.7) | <b>9.90</b> (7.80,13.8)           | <b>29.0</b> (21.8,40.5)           | <b>114</b> (71.7,200)             | <b>396</b> (175,916)              | 1270               |
|                       | 07-08               | <b>10.9</b> (8.86,13.4) | <b>8.30</b> (6.30,9.90)           | <b>29.4</b> (23.2,39.6)           | <b>139</b> (100,248)              | <b>546</b> (311,727)              | 1294               |
|                       | 09-10               | <b>7.09</b> (5.68,8.85) | <b>5.30</b> (4.40,6.70)           | <b>21.9</b> (15.2,33.5)           | <b>103</b> (63.3,191)             | <b>311</b> (133,736)              | 1399               |
| Females               | 03-04               | <b>11.2</b> (8.51,14.7) | <b>8.50</b> (6.30,12.0)           | <b>42.8</b> (26.0,64.2)           | <b>212</b> (141,364)              | <b>732</b> (371,1100)             | 1294               |
|                       | 05-06               | <b>7.69</b> (5.17,11.4) | <b>5.90</b> (3.90,9.40)           | <b>21.1</b> (14.3,35.7)           | <b>110</b> (60.5,183)             | <b>317</b> (141,794)              | 1278               |
|                       | 07-08               | <b>7.57</b> (5.70,10.1) | <b>5.50</b> (4.40,7.30)           | <b>20.6</b> (13.9,31.8)           | <b>118</b> (57.4,268)             | <b>442</b> (213,838)              | 1310               |
|                       | 09-10               | <b>5.28</b> (4.17,6.69) | <b>3.90</b> (3.00,5.10)           | <b>16.7</b> (12.1,22.1)           | <b>99.5</b> (58.2,156)            | <b>287</b> (158,591)              | 1350               |
| <b>Race/ethnicity</b> |                     |                         |                                   |                                   |                                   |                                   |                    |
| Mexican Americans     | 03-04               | <b>30.1</b> (19.2,47.2) | <b>23.7</b> (14.7,39.8)           | <b>103</b> (57.4,156)             | <b>841</b> (282,2040)             | <b>2370</b> (2040,3710)           | 617                |
|                       | 05-06               | <b>32.2</b> (22.2,46.7) | <b>23.0</b> (14.9,37.1)           | <b>120</b> (69.6,228)             | <b>867</b> (298,1320)             | <b>1630</b> (916,3650)            | 637                |
|                       | 07-08               | <b>22.2</b> (9.88,49.8) | <b>16.4</b> (5.40,60.7)           | <b>104</b> (35.2,364)             | <b>566</b> (313,1710)             | <b>1920</b> (672,3460)            | 531                |
|                       | 09-10               | <b>13.0</b> (5.80,29.1) | <b>10.3</b> (3.30,26.2)           | <b>53.6</b> (19.4,199)            | <b>361</b> (124,900)              | <b>998</b> (247,3700)             | 566                |
| Non-Hispanic blacks   | 03-04               | <b>54.0</b> (35.9,81.2) | <b>43.9</b> (26.2,65.6)           | <b>159</b> (97.0,338)             | <b>817</b> (342,2330)             | <b>2330</b> (887,3730)            | 636                |
|                       | 05-06               | <b>43.9</b> (33.2,58.1) | <b>33.2</b> (25.3,47.6)           | <b>161</b> (79.9,255)             | <b>722</b> (360,1370)             | <b>1700</b> (886,6440)            | 678                |
|                       | 07-08               | <b>27.4</b> (21.3,35.2) | <b>18.5</b> (13.2,26.7)           | <b>102</b> (61.9,147)             | <b>682</b> (364,943)              | <b>1490</b> (933,1870)            | 597                |
|                       | 09-10               | <b>23.0</b> (13.0,40.8) | <b>17.3</b> (8.00,42.7)           | <b>82.7</b> (38.6,168)            | <b>443</b> (119,2180)             | <b>1240</b> (273,4940)            | 516                |
| Non-Hispanic whites   | 03-04               | <b>8.94</b> (7.15,11.2) | <b>7.80</b> (6.30,9.40)           | <b>25.9</b> (19.3,36.6)           | <b>115</b> (61.8,171)             | <b>255</b> (148,522)              | 1077               |
|                       | 05-06               | <b>6.19</b> (4.18,9.17) | <b>5.90</b> (3.80,9.20)           | <b>15.7</b> (11.4,21.9)           | <b>43.7</b> (31.2,73.1)           | <b>105</b> (62.2,166)             | 1038               |
|                       | 07-08               | <b>6.24</b> (5.04,7.74) | <b>5.10</b> (4.20,6.20)           | <b>15.4</b> (12.2,19.9)           | <b>49.8</b> (37.0,90.2)           | <b>142</b> (103,294)              | 1077               |
|                       | 09-10               | <b>4.10</b> (3.22,5.21) | <b>3.30</b> (2.60,4.40)           | <b>10.9</b> (8.10,15.5)           | <b>45.5</b> (29.0,82.7)           | <b>124</b> (79.3,215)             | 1206               |

**Supplemental Material Table S2.** Urinary concentrations in µg/L of 2,4-DCP (95<sup>th</sup> CI) stratified by age, sex, and race/ethnicity for NHANES cycles 2003–2004, 2005–2006, 2007–2008, and 2009–2010.

|                       | Survey years | Geometric mean          | 50 <sup>th</sup> Percentile | 75 <sup>th</sup> Percentile | 90 <sup>th</sup> Percentile | 95 <sup>th</sup> Percentile | Sample size |
|-----------------------|--------------|-------------------------|-----------------------------|-----------------------------|-----------------------------|-----------------------------|-------------|
| Total                 | 03-04        | <b>1.04</b> (.895,1.21) | <b>.900</b> (.800,1.10)     | <b>2.70</b> (2.30,3.10)     | <b>8.80</b> (6.60,11.9)     | <b>21.3</b> (14.1,29.5)     | 2525        |
|                       | 05-06        | <b>.945</b> (.791,1.13) | <b>.800</b> (.700,1.00)     | <b>2.00</b> (1.60,2.40)     | <b>4.90</b> (3.90,6.30)     | <b>11.9</b> (7.00,20.4)     | 2548        |
|                       | 07-08        | <b>.970</b> (.852,1.11) | <b>.800</b> (.700,.900)     | <b>1.80</b> (1.50,2.30)     | <b>5.10</b> (3.80,7.60)     | <b>12.6</b> (9.00,18.1)     | 2604        |
|                       | 09-10        | <b>.803</b> (.729,.885) | <b>.700</b> (.700,.800)     | <b>1.50</b> (1.40,1.70)     | <b>4.00</b> (3.30,5.00)     | <b>8.80</b> (6.40,15.7)     | 2749        |
| <b>Age group</b>      |              |                         |                             |                             |                             |                             |             |
| 6-11 years            | 03-04        | <b>1.01</b> (.796,1.28) | <b>.800</b> (.600,1.20)     | <b>2.30</b> (1.70,3.20)     | <b>7.70</b> (3.80,20.1)     | <b>23.5</b> (9.40,31.0)     | 314         |
|                       | 05-06        | <b>1.01</b> (.879,1.15) | <b>.800</b> (.800,1.10)     | <b>2.00</b> (1.60,2.30)     | <b>4.90</b> (3.30,6.60)     | <b>9.80</b> (6.30,17.6)     | 356         |
|                       | 07-08        | <b>1.04</b> (.778,1.39) | <b>.900</b> (.700,1.20)     | <b>1.80</b> (1.20,2.80)     | <b>5.90</b> (2.90,10.1)     | <b>11.4</b> (6.60,20.7)     | 389         |
|                       | 09-10        | <b>.975</b> (.768,1.24) | <b>.700</b> (.600,.900)     | <b>1.80</b> (1.40,2.30)     | <b>5.00</b> (3.20,8.40)     | <b>14.2</b> (4.40,90.9)     | 415         |
| 12-19 years           | 03-04        | <b>1.27</b> (.971,1.67) | <b>1.10</b> (.800,1.50)     | <b>3.40</b> (2.50,5.00)     | <b>13.6</b> (6.10,25.5)     | <b>31.5</b> (14.5,85.0)     | 722         |
|                       | 05-06        | <b>1.18</b> (.997,1.39) | <b>1.00</b> (.900,1.20)     | <b>2.50</b> (2.00,3.10)     | <b>5.50</b> (4.00,8.30)     | <b>13.9</b> (7.10,33.6)     | 702         |
|                       | 07-08        | <b>1.19</b> (.989,1.44) | <b>1.10</b> (.800,1.40)     | <b>2.60</b> (2.00,3.00)     | <b>5.60</b> (3.10,10.8)     | <b>11.6</b> (5.70,36.5)     | 401         |
|                       | 09-10        | <b>.967</b> (.794,1.18) | <b>.800</b> (.700,.900)     | <b>1.60</b> (1.40,2.70)     | <b>5.80</b> (3.70,10.1)     | <b>14.4</b> (7.10,24.8)     | 420         |
| 20 years and older    | 03-04        | <b>1.01</b> (.874,1.17) | <b>.900</b> (.700,1.10)     | <b>2.60</b> (2.20,3.00)     | <b>8.50</b> (6.60,10.4)     | <b>19.4</b> (12.2,27.0)     | 1489        |
|                       | 05-06        | <b>.907</b> (.737,1.12) | <b>.800</b> (.600,1.00)     | <b>2.00</b> (1.50,2.40)     | <b>4.90</b> (3.70,6.40)     | <b>11.1</b> (6.50,20.9)     | 1490        |
|                       | 07-08        | <b>.932</b> (.820,1.06) | <b>.800</b> (.700,.900)     | <b>1.70</b> (1.40,2.20)     | <b>5.00</b> (3.80,7.60)     | <b>13.2</b> (9.20,18.1)     | 1814        |
|                       | 09-10        | <b>.764</b> (.699,.836) | <b>.700</b> (.600,.700)     | <b>1.40</b> (1.30,1.60)     | <b>3.60</b> (3.10,4.50)     | <b>8.00</b> (5.60,13.9)     | 1914        |
| <b>Sex</b>            |              |                         |                             |                             |                             |                             |             |
| Males                 | 03-04        | <b>1.22</b> (1.02,1.45) | <b>1.10</b> (.800,1.50)     | <b>3.00</b> (2.50,3.50)     | <b>9.40</b> (6.80,13.9)     | <b>22.7</b> (13.6,40.9)     | 1231        |
|                       | 05-06        | <b>1.16</b> (.973,1.37) | <b>1.00</b> (.900,1.20)     | <b>2.40</b> (2.00,2.80)     | <b>5.50</b> (4.40,7.90)     | <b>12.9</b> (7.30,25.3)     | 1270        |
|                       | 07-08        | <b>1.06</b> (.943,1.19) | <b>.900</b> (.800,1.00)     | <b>1.90</b> (1.60,2.20)     | <b>5.40</b> (3.90,8.20)     | <b>13.6</b> (10.1,18.1)     | 1294        |
|                       | 09-10        | <b>.879</b> (.789,.979) | <b>.800</b> (.700,.800)     | <b>1.60</b> (1.40,1.80)     | <b>4.00</b> (3.20,5.70)     | <b>10.4</b> (5.20,18.4)     | 1399        |
| Females               | 03-04        | <b>.896</b> (.754,1.07) | <b>.800</b> (.600,.900)     | <b>2.30</b> (2.00,2.70)     | <b>8.10</b> (5.70,11.1)     | <b>19.8</b> (12.0,27.5)     | 1294        |
|                       | 05-06        | <b>.779</b> (.637,.954) | <b>.700</b> (.500,.800)     | <b>1.50</b> (1.30,2.10)     | <b>4.30</b> (2.80,6.20)     | <b>9.40</b> (5.40,19.6)     | 1278        |
|                       | 07-08        | <b>.893</b> (.750,1.06) | <b>.700</b> (.600,.800)     | <b>1.80</b> (1.20,2.50)     | <b>4.70</b> (3.10,8.00)     | <b>11.9</b> (7.60,18.6)     | 1310        |
|                       | 09-10        | <b>.737</b> (.659,.824) | <b>.600</b> (.600,.700)     | <b>1.40</b> (1.30,1.70)     | <b>4.00</b> (3.00,5.50)     | <b>7.80</b> (5.80,15.8)     | 1350        |
| <b>Race/ethnicity</b> |              |                         |                             |                             |                             |                             |             |
| Mexican Americans     | 03-04        | <b>1.94</b> (1.46,2.56) | <b>1.70</b> (1.20,2.10)     | <b>4.50</b> (2.80,9.30)     | <b>26.9</b> (12.7,52.1)     | <b>66.0</b> (47.5,84.2)     | 617         |
|                       | 05-06        | <b>1.97</b> (1.49,2.59) | <b>1.60</b> (1.20,2.10)     | <b>5.00</b> (3.30,6.60)     | <b>20.9</b> (8.80,39.7)     | <b>46.5</b> (21.9,79.5)     | 637         |
|                       | 07-08        | <b>1.59</b> (.969,2.60) | <b>1.20</b> (.600,2.60)     | <b>4.20</b> (2.10,9.50)     | <b>13.4</b> (7.90,29.6)     | <b>38.0</b> (16.4,74.0)     | 531         |
|                       | 09-10        | <b>1.25</b> (.860,1.81) | <b>.900</b> (.700,1.30)     | <b>2.70</b> (1.60,4.30)     | <b>11.3</b> (4.30,26.3)     | <b>29.1</b> (7.60,76.3)     | 566         |
| Non-Hispanic blacks   | 03-04        | <b>2.42</b> (1.92,3.06) | <b>2.20</b> (1.70,2.70)     | <b>7.40</b> (4.00,9.60)     | <b>20.8</b> (11.2,38.3)     | <b>49.2</b> (24.0,69.7)     | 636         |
|                       | 05-06        | <b>2.45</b> (1.93,3.12) | <b>2.10</b> (1.70,2.40)     | <b>5.20</b> (3.90,7.40)     | <b>20.3</b> (10.6,36.9)     | <b>42.6</b> (21.3,129)      | 678         |
|                       | 07-08        | <b>1.73</b> (1.49,2.01) | <b>1.40</b> (1.10,1.60)     | <b>3.70</b> (2.90,4.90)     | <b>17.8</b> (9.70,25.8)     | <b>37.7</b> (24.6,56.8)     | 597         |
|                       | 09-10        | <b>1.54</b> (1.06,2.23) | <b>1.20</b> (.800,2.00)     | <b>3.10</b> (2.10,4.80)     | <b>12.4</b> (4.30,46.4)     | <b>35.2</b> (7.80,107)      | 516         |
| Non-Hispanic whites   | 03-04        | <b>.837</b> (.698,1.00) | <b>.700</b> (.600,.900)     | <b>2.10</b> (1.70,2.60)     | <b>6.20</b> (4.00,8.80)     | <b>13.4</b> (8.60,22.0)     | 1077        |
|                       | 05-06        | <b>.734</b> (.610,.883) | <b>.700</b> (.500,.900)     | <b>1.40</b> (1.20,1.80)     | <b>3.10</b> (2.70,3.90)     | <b>5.30</b> (4.30,7.90)     | 1038        |
|                       | 07-08        | <b>.817</b> (.732,.911) | <b>.700</b> (.600,.800)     | <b>1.50</b> (1.20,1.80)     | <b>3.10</b> (2.60,4.40)     | <b>6.40</b> (4.60,8.80)     | 1077        |
|                       | 09-10        | <b>.651</b> (.594,.712) | <b>.600</b> (.500,.700)     | <b>1.30</b> (1.10,1.40)     | <b>2.80</b> (2.20,3.50)     | <b>5.60</b> (3.80,7.40)     | 1206        |

**Supplemental Material Table S3.** Creatinine corrected urinary concentrations in  $\mu\text{g/g}$  creatinine of 2,5-DCP (95<sup>th</sup> CI), stratified by age, sex, and race/ethnicity from NHANES cycles 2003–04, 2005–2006, 2007–2008, and 2009–2010.

|                       | Survey years | Geometric mean           | 50 <sup>th</sup> Percentile | 75 <sup>th</sup> Percentile | 90 <sup>th</sup> Percentile | 95 <sup>th</sup> Percentile | Sample size |
|-----------------------|--------------|--------------------------|-----------------------------|-----------------------------|-----------------------------|-----------------------------|-------------|
| Total                 | 03-04        | <b>12.5</b> (10.1, 15.6) | <b>9.29</b> (7.25, 12.5)    | <b>34.4</b> (26.8, 45.4)    | <b>141</b> (100, 251)       | <b>578</b> (313, 851)       | 2522        |
|                       | 05-06        | <b>9.31</b> (6.70,12.9)  | <b>7.32</b> (5.33,10.2)     | <b>20.4</b> (14.8,30.5)     | <b>89.3</b> (54.9,176)      | <b>292</b> (176,640)        | 2548        |
|                       | 07-08        | <b>9.12</b> (7.35,11.3)  | <b>6.24</b> (5.00,7.77)     | <b>24.2</b> (17.2,30.3)     | <b>109</b> (70.8,175)       | <b>409</b> (234,745)        | 2604        |
|                       | 09-10        | <b>6.36</b> (5.07,7.99)  | <b>4.12</b> (3.31,5.16)     | <b>16.2</b> (11.7,22.8)     | <b>80.2</b> (59.5,127)      | <b>269</b> (144,505)        | 2749        |
| <b>Age group</b>      |              |                          |                             |                             |                             |                             |             |
| 6-11 years            | 03-04        | <b>15.2</b> (9.93,23.1)  | <b>10.6</b> (5.87,26.7)     | <b>44.7</b> (28.9,80.0)     | <b>183</b> (95.3,617)       | <b>830</b> (330,2150)       | 314         |
|                       | 05-06        | <b>11.6</b> (8.90,15.1)  | <b>8.00</b> (5.95,12.6)     | <b>24.7</b> (16.8,37.8)     | <b>129</b> (55.8,242)       | <b>419</b> (151,709)        | 356         |
|                       | 07-08        | <b>11.5</b> (7.95,16.5)  | <b>7.70</b> (5.41,11.7)     | <b>29.5</b> (19.6,50.9)     | <b>131</b> (59.9,239)       | <b>420</b> (170,1110)       | 389         |
|                       | 09-10        | <b>9.36</b> (5.65,15.5)  | <b>6.25</b> (4.09,9.60)     | <b>33.9</b> (12.6,65.0)     | <b>177</b> (66.1,496)       | <b>536</b> (111,5950)       | 415         |
| 12-19 years           | 03-04        | <b>12.7</b> (8.50,18.9)  | <b>9.05</b> (6.17,13.3)     | <b>34.8</b> (18.6,67.0)     | <b>177</b> (67.0,516)       | <b>549</b> (187,2120)       | 720         |
|                       | 05-06        | <b>8.88</b> (6.34,12.4)  | <b>6.91</b> (4.15,11.1)     | <b>23.4</b> (17.7,30.0)     | <b>78.0</b> (58.5,112)      | <b>279</b> (112,659)        | 702         |
|                       | 07-08        | <b>8.79</b> (6.81,11.4)  | <b>5.56</b> (4.42,7.50)     | <b>20.9</b> (13.8,34.9)     | <b>130</b> (41.8,251)       | <b>353</b> (158,799)        | 401         |
|                       | 09-10        | <b>6.44</b> (4.40,9.42)  | <b>4.05</b> (2.34,8.69)     | <b>19.4</b> (11.6,37.7)     | <b>121</b> (49.3,218)       | <b>257</b> (119,1180)       | 420         |
| 20 years and older    | 03-04        | <b>12.2</b> (10.1,14.8)  | <b>9.13</b> (7.25,12.4)     | <b>32.7</b> (26.7,42.9)     | <b>140</b> (103,203)        | <b>552</b> (283,838)        | 1488        |
|                       | 05-06        | <b>9.15</b> (6.43,13.0)  | <b>7.29</b> (5.29,10.0)     | <b>19.6</b> (14.2,30.4)     | <b>90.7</b> (48.5,197)      | <b>274</b> (163,701)        | 1490        |
|                       | 07-08        | <b>8.94</b> (7.07,11.3)  | <b>6.15</b> (4.93,8.00)     | <b>24.3</b> (16.6,30.6)     | <b>101</b> (70.0,162)       | <b>422</b> (234,729)        | 1814        |
|                       | 09-10        | <b>6.09</b> (4.97,7.45)  | <b>3.97</b> (3.27,4.78)     | <b>14.7</b> (11.0,20.5)     | <b>72.5</b> (56.6,97.2)     | <b>261</b> (141,446)        | 1914        |
| <b>Sex</b>            |              |                          |                             |                             |                             |                             |             |
| Males                 | 03-04        | <b>12.2</b> (9.73,15.3)  | <b>9.65</b> (7.23,12.7)     | <b>32.7</b> (25.3,39.1)     | <b>108</b> (79.0,183)       | <b>358</b> (161,1080)       | 1230        |
|                       | 05-06        | <b>9.60</b> (7.17,12.9)  | <b>8.11</b> (5.95,10.5)     | <b>20.5</b> (15.9,28.2)     | <b>74.9</b> (50.5,141)      | <b>249</b> (137,534)        | 1270        |
|                       | 07-08        | <b>9.17</b> (7.63,11.0)  | <b>6.24</b> (5.22,7.81)     | <b>25.5</b> (19.7,32.4)     | <b>110</b> (70.7,167)       | <b>353</b> (234,572)        | 1294        |
|                       | 09-10        | <b>6.36</b> (5.04,8.02)  | <b>4.21</b> (3.36,4.97)     | <b>16.7</b> (11.7,24.0)     | <b>83.2</b> (53.7,141)      | <b>280</b> (111,727)        | 1399        |
| Females               | 03-04        | <b>12.9</b> (9.91,16.8)  | <b>8.95</b> (6.98,13.2)     | <b>37.1</b> (26.7,56.9)     | <b>209</b> (124,362)        | <b>660</b> (408,940)        | 1292        |
|                       | 05-06        | <b>9.04</b> (6.18,13.2)  | <b>6.60</b> (4.56,10.4)     | <b>20.4</b> (14.1,33.8)     | <b>104</b> (55.8,199)       | <b>309</b> (149,933)        | 1278        |
|                       | 07-08        | <b>9.07</b> (6.91,11.9)  | <b>6.08</b> (4.71,8.04)     | <b>22.4</b> (14.7,30.6)     | <b>107</b> (59.2,216)       | <b>509</b> (185,908)        | 1310        |
|                       | 09-10        | <b>6.37</b> (4.92,8.25)  | <b>4.10</b> (3.09,5.69)     | <b>15.6</b> (11.3,22.1)     | <b>77.1</b> (53.3,148)      | <b>267</b> (151,481)        | 1350        |
| <b>Race/ethnicity</b> |              |                          |                             |                             |                             |                             |             |
| Mexican Americans     | 03-04        | <b>27.3</b> (17.4,42.9)  | <b>17.8</b> (9.86,36.3)     | <b>79.8</b> (45.8,138)      | <b>809</b> (196,2110)       | <b>2200</b> (1250,2480)     | 616         |
|                       | 05-06        | <b>29.0</b> (20.5,41.0)  | <b>18.6</b> (12.9,27.3)     | <b>99.4</b> (61.6,165)      | <b>675</b> (296,1400)       | <b>1680</b> (718,2720)      | 637         |
|                       | 07-08        | <b>21.6</b> (9.44,49.6)  | <b>16.4</b> (5.09,58.9)     | <b>83.9</b> (30.8,281)      | <b>572</b> (182,1490)       | <b>1490</b> (700,2220)      | 531         |
|                       | 09-10        | <b>12.9</b> (5.78,28.8)  | <b>9.12</b> (3.38,26.7)     | <b>45.0</b> (17.3,236)      | <b>460</b> (105,1000)       | <b>1000</b> (380,2800)      | 566         |
| Non-Hispanic blacks   | 03-04        | <b>37.1</b> (24.3,56.7)  | <b>27.4</b> (17.5,47.7)     | <b>103</b> (63.8,216)       | <b>609</b> (248,1210)       | <b>1240</b> (627,2430)      | 635         |
|                       | 05-06        | <b>30.9</b> (23.6,40.3)  | <b>20.5</b> (17.3,29.1)     | <b>104</b> (57.7,180)       | <b>480</b> (294,1080)       | <b>1480</b> (515,3100)      | 678         |
|                       | 07-08        | <b>21.3</b> (16.2,27.9)  | <b>14.6</b> (10.2,19.7)     | <b>64.6</b> (48.0,101)      | <b>529</b> (217,884)        | <b>1130</b> (793,1560)      | 597         |
|                       | 09-10        | <b>16.7</b> (9.19,30.2)  | <b>12.5</b> (6.74,22.0)     | <b>58.9</b> (22.3,106)      | <b>349</b> (92.6,878)       | <b>878</b> (277,3890)       | 516         |
| Non-Hispanic whites   | 03-04        | <b>9.24</b> (7.48,11.4)  | <b>7.14</b> (5.67,8.76)     | <b>24.8</b> (18.7,31.7)     | <b>79.7</b> (50.2,141)      | <b>216</b> (124,516)        | 1076        |
|                       | 05-06        | <b>6.52</b> (4.51,9.43)  | <b>5.60</b> (3.86,8.51)     | <b>14.1</b> (10.7,19.7)     | <b>40.2</b> (28.4,61.6)     | <b>110</b> (47.3,224)       | 1038        |
|                       | 07-08        | <b>6.52</b> (5.26,8.07)  | <b>4.89</b> (3.95,6.20)     | <b>14.4</b> (11.4,19.2)     | <b>53.2</b> (40.1,75.9)     | <b>131</b> (82.5,249)       | 1077        |
|                       | 09-10        | <b>4.60</b> (3.59,5.90)  | <b>3.27</b> (2.77,4.10)     | <b>10.4</b> (7.22,15.2)     | <b>41.3</b> (25.0,69.1)     | <b>130</b> (73.4,180)       | 1206        |

**Supplemental Material Table S4.** Creatinine corrected urinary concentrations in  $\mu\text{g/g}$  creatinine of 2,4-DCP (95<sup>th</sup> CI), stratified by age, sex, and race/ethnicity from NHANES cycles 2003–04, 2005–2006, 2007–2008, and 2009–2010.

|                       | Survey years | Geometric mean          | 50 <sup>th</sup> Percentile | 75 <sup>th</sup> Percentile | 90 <sup>th</sup> Percentile | 95 <sup>th</sup> Percentile | Sample size |
|-----------------------|--------------|-------------------------|-----------------------------|-----------------------------|-----------------------------|-----------------------------|-------------|
| Total                 | 03-04        | <b>1.02</b> (.873,1.18) | <b>.880</b> (.770,1.00)     | <b>2.19</b> (1.84,2.73)     | <b>7.39</b> (5.00,9.83)     | <b>15.4</b> (11.1,20.9)     | 2522        |
|                       | 05-06        | <b>.922</b> (.798,1.06) | <b>.750</b> (.660,.880)     | <b>1.58</b> (1.33,1.86)     | <b>4.00</b> (3.00,5.71)     | <b>8.90</b> (5.98,16.6)     | 2548        |
|                       | 07-08        | <b>.978</b> (.867,1.10) | <b>.790</b> (.700,.880)     | <b>1.63</b> (1.36,1.89)     | <b>4.00</b> (3.14,5.63)     | <b>11.7</b> (6.82,18.9)     | 2604        |
|                       | 09-10        | <b>.838</b> (.757,.929) | <b>.680</b> (.630,.740)     | <b>1.33</b> (1.18,1.58)     | <b>3.48</b> (2.77,4.55)     | <b>8.17</b> (5.44,14.3)     | 2749        |
| <b>Age group</b>      |              |                         |                             |                             |                             |                             |             |
| 6-11 years            | 03-04        | <b>1.23</b> (.965,1.56) | <b>1.03</b> (.750,1.45)     | <b>2.39</b> (1.82,3.36)     | <b>9.29</b> (3.98,16.5)     | <b>20.9</b> (12.9,38.1)     | 314         |
|                       | 05-06        | <b>1.11</b> (.950,1.29) | <b>.970</b> (.800,1.08)     | <b>1.74</b> (1.38,2.19)     | <b>4.38</b> (3.33,7.80)     | <b>10.9</b> (5.12,23.3)     | 356         |
|                       | 07-08        | <b>1.28</b> (1.00,1.63) | <b>1.06</b> (.750,1.40)     | <b>2.06</b> (1.44,3.21)     | <b>4.49</b> (3.13,9.27)     | <b>11.2</b> (5.70,24.4)     | 389         |
|                       | 09-10        | <b>1.27</b> (.986,1.64) | <b>.930</b> (.820,1.20)     | <b>2.03</b> (1.54,2.94)     | <b>5.89</b> (3.50,11.0)     | <b>15.9</b> (5.71,121)      | 415         |
| 12-19 years           | 03-04        | <b>.954</b> (.725,1.26) | <b>.790</b> (.660,1.00)     | <b>2.08</b> (1.44,3.75)     | <b>8.02</b> (4.72,12.5)     | <b>14.8</b> (8.02,40.0)     | 720         |
|                       | 05-06        | <b>.878</b> (.765,1.01) | <b>.700</b> (.600,.800)     | <b>1.65</b> (1.22,1.93)     | <b>3.92</b> (2.90,4.82)     | <b>8.28</b> (4.82,15.9)     | 702         |
|                       | 07-08        | <b>.927</b> (.776,1.11) | <b>.790</b> (.640,1.00)     | <b>1.51</b> (1.14,2.22)     | <b>3.81</b> (2.38,5.92)     | <b>10.3</b> (4.28,21.8)     | 401         |
|                       | 09-10        | <b>.778</b> (.656,.921) | <b>.580</b> (.510,.690)     | <b>1.18</b> (.970,1.40)     | <b>3.38</b> (2.11,6.27)     | <b>7.38</b> (3.39,19.4)     | 420         |
| 20 years and older    | 03-04        | <b>1.00</b> (.863,1.16) | <b>.870</b> (.770,1.00)     | <b>2.17</b> (1.80,2.69)     | <b>7.16</b> (4.88,9.01)     | <b>15.0</b> (10.6,20.8)     | 1488        |
|                       | 05-06        | <b>.909</b> (.774,1.07) | <b>.740</b> (.650,.870)     | <b>1.55</b> (1.25,1.89)     | <b>4.00</b> (2.84,6.19)     | <b>8.80</b> (5.71,16.8)     | 1490        |
|                       | 07-08        | <b>.958</b> (.847,1.08) | <b>.770</b> (.670,.880)     | <b>1.60</b> (1.32,1.85)     | <b>3.98</b> (3.14,5.59)     | <b>12.1</b> (8.15,18.9)     | 1814        |
|                       | 09-10        | <b>.810</b> (.735,.892) | <b>.670</b> (.620,.730)     | <b>1.27</b> (1.11,1.56)     | <b>3.33</b> (2.65,4.23)     | <b>7.64</b> (5.16,12.3)     | 1914        |
| <b>Sex</b>            |              |                         |                             |                             |                             |                             |             |
| Males                 | 03-04        | <b>.995</b> (.850,1.17) | <b>.900</b> (.730,1.06)     | <b>2.23</b> (1.82,2.82)     | <b>6.84</b> (4.54,9.01)     | <b>13.7</b> (9.29,21.8)     | 1230        |
|                       | 05-06        | <b>.927</b> (.814,1.06) | <b>.770</b> (.670,.880)     | <b>1.60</b> (1.36,1.86)     | <b>4.12</b> (3.08,5.45)     | <b>8.90</b> (5.19,16.6)     | 1270        |
|                       | 07-08        | <b>.891</b> (.808,.984) | <b>.720</b> (.660,.790)     | <b>1.44</b> (1.29,1.67)     | <b>4.00</b> (2.97,5.30)     | <b>9.96</b> (6.82,13.4)     | 1294        |
|                       | 09-10        | <b>.788</b> (.706,.879) | <b>.620</b> (.580,.660)     | <b>1.25</b> (1.06,1.48)     | <b>3.66</b> (2.52,5.47)     | <b>7.69</b> (4.84,16.9)     | 1399        |
| Females               | 03-04        | <b>1.03</b> (.845,1.27) | <b>.870</b> (.770,1.00)     | <b>2.17</b> (1.73,2.73)     | <b>8.00</b> (4.57,12.1)     | <b>17.2</b> (11.1,23.7)     | 1292        |
|                       | 05-06        | <b>.916</b> (.770,1.09) | <b>.740</b> (.640,.880)     | <b>1.56</b> (1.19,1.96)     | <b>3.91</b> (2.66,6.50)     | <b>8.93</b> (5.53,23.7)     | 1278        |
|                       | 07-08        | <b>1.07</b> (.910,1.26) | <b>.850</b> (.720,1.00)     | <b>1.75</b> (1.43,2.29)     | <b>4.07</b> (3.13,7.65)     | <b>14.4</b> (6.50,26.8)     | 1310        |
|                       | 09-10        | <b>.890</b> (.789,1.00) | <b>.740</b> (.660,.850)     | <b>1.41</b> (1.24,1.67)     | <b>3.39</b> (2.76,4.52)     | <b>8.79</b> (5.16,14.8)     | 1350        |
| <b>Race/ethnicity</b> |              |                         |                             |                             |                             |                             |             |
| Mexican Americans     | 03-04        | <b>1.76</b> (1.30,2.38) | <b>1.33</b> (1.04,1.74)     | <b>3.85</b> (2.29,8.81)     | <b>23.8</b> (10.6,51.6)     | <b>71.4</b> (30.8,88.8)     | 616         |
|                       | 05-06        | <b>1.77</b> (1.38,2.27) | <b>1.25</b> (.990,1.73)     | <b>3.79</b> (2.70,5.35)     | <b>16.6</b> (6.75,31.8)     | <b>38.1</b> (23.8,55.3)     | 637         |
|                       | 07-08        | <b>1.55</b> (.925,2.60) | <b>1.18</b> (.630,2.28)     | <b>3.33</b> (1.93,6.50)     | <b>14.2</b> (5.65,30.6)     | <b>33.1</b> (16.6,60.0)     | 531         |
|                       | 09-10        | <b>1.24</b> (.860,1.78) | <b>.910</b> (.630,1.28)     | <b>2.03</b> (1.43,3.90)     | <b>11.0</b> (3.54,26.4)     | <b>26.4</b> (10.2,93.5)     | 566         |
| Non-Hispanic blacks   | 03-04        | <b>1.66</b> (1.28,2.16) | <b>1.47</b> (1.06,1.96)     | <b>4.14</b> (2.46,7.31)     | <b>14.9</b> (7.93,20.1)     | <b>22.9</b> (16.7,45.0)     | 635         |
|                       | 05-06        | <b>1.72</b> (1.39,2.14) | <b>1.32</b> (1.11,1.56)     | <b>3.28</b> (2.33,5.35)     | <b>14.9</b> (7.40,28.1)     | <b>37.0</b> (15.0,83.4)     | 678         |
|                       | 07-08        | <b>1.34</b> (1.14,1.59) | <b>.990</b> (.800,1.17)     | <b>2.36</b> (1.85,3.12)     | <b>13.1</b> (5.70,23.3)     | <b>33.8</b> (22.7,41.1)     | 597         |
|                       | 09-10        | <b>1.11</b> (.739,1.67) | <b>.890</b> (.630,1.19)     | <b>2.07</b> (1.25,3.87)     | <b>8.37</b> (2.99,22.0)     | <b>22.0</b> (7.05,83.1)     | 516         |
| Non-Hispanic whites   | 03-04        | <b>.864</b> (.721,1.03) | <b>.780</b> (.690,.890)     | <b>1.86</b> (1.54,2.23)     | <b>5.08</b> (3.58,8.00)     | <b>10.8</b> (6.84,18.2)     | 1076        |
|                       | 05-06        | <b>.772</b> (.660,.904) | <b>.670</b> (.580,.790)     | <b>1.25</b> (1.07,1.56)     | <b>2.78</b> (2.11,3.52)     | <b>4.82</b> (3.33,8.62)     | 1038        |
|                       | 07-08        | <b>.853</b> (.765,.950) | <b>.730</b> (.660,.810)     | <b>1.36</b> (1.14,1.67)     | <b>2.97</b> (2.53,3.33)     | <b>5.16</b> (3.84,9.38)     | 1077        |
|                       | 09-10        | <b>.731</b> (.674,.793) | <b>.630</b> (.580,.690)     | <b>1.13</b> (1.01,1.25)     | <b>2.76</b> (2.29,3.30)     | <b>5.16</b> (3.79,6.46)     | 1206        |

**Supplemental Material Table S5.** Observed statistical significance P values for differences between adjusted geometric mean urinary concentrations of 2,4-DCP and 2,5-DCP for various demographic groups<sup>a</sup>.

| <b>Differences</b>                                 | <b>2,5-DCP</b> | <b>2,4-DCP</b> |
|----------------------------------------------------|----------------|----------------|
| <b>Survey period</b>                               |                |                |
| 2003–2004 vs 2005–2006                             | 0.148          | 0.559          |
| 2003–2004 vs 2007–2008                             | 0.015          | 0.640          |
| 2003–2004 vs 2009–2010                             | <0.001         | 0.006          |
| 2005–2006 vs 2007–2008                             | 0.619          | 0.851          |
| 2005–2006 vs 2009–2010                             | 0.011          | 0.027          |
| 2007–2008 vs 2009–2010                             | 0.009          | 0.004          |
| <b>Age group (years)</b>                           |                |                |
| 6–11 vs 12–19                                      | <0.001         | <0.001         |
| 6–11 vs 20–59                                      | 0.003          | <0.001         |
| 6–11 vs 60+                                        | 0.738          | 0.423          |
| 12–19 vs 20–59                                     | 0.328          | 0.967          |
| 12–19 vs 60+                                       | <0.001         | 0.001          |
| 20–59 vs 60+                                       | <0.001         | <0.001         |
| <b>Family income<sup>b</sup> by race/ethnicity</b> |                |                |
| Below poverty vs low, Mexican American             | 0.035          | 0.171          |
| Below poverty vs middle, Mexican American          | 0.009          | 0.007          |
| Below poverty vs high, Mexican American            | <0.001         | <0.001         |
| Low vs middle, Mexican American                    | 0.263          | 0.127          |
| Low vs high, Mexican American                      | <0.001         | <0.001         |
| Middle vs high, Mexican American                   | 0.001          | 0.011          |
| Below poverty vs low, non-Hispanic white           | 0.175          | 0.043          |
| Below poverty vs middle, non-Hispanic white        | 0.062          | 0.268          |
| Below poverty vs high, non-Hispanic white          | 0.021          | 0.173          |
| Low vs middle, non-Hispanic white                  | 0.688          | 0.140          |
| Low vs high, non-Hispanic white                    | 0.412          | 0.299          |
| Middle vs high, non-Hispanic white                 | 0.626          | 0.665          |
| Below poverty vs low, non-Hispanic black           | 0.287          | 0.199          |
| Below poverty vs middle, non-Hispanic black        | 0.888          | 0.301          |
| Below poverty vs high, non-Hispanic black          | 0.184          | 0.198          |
| Low vs middle, non-Hispanic black                  | 0.299          | 0.501          |
| Low vs high, non-Hispanic black                    | 0.023          | 0.013          |
| Middle vs high, non-Hispanic black                 | 0.118          | 0.021          |

| Differences                                                | 2,5-DCP | 2,4-DCP |
|------------------------------------------------------------|---------|---------|
| <b>Race/ethnicity by family income</b>                     |         |         |
| Mexican American vs non-Hispanic white, at below poverty   | <0.001  | <0.001  |
| Mexican American vs non-Hispanic black, at below poverty   | 0.323   | 0.080   |
| non-Hispanic white vs non-Hispanic black, at below poverty | <0.001  | <0.001  |
| Mexican American vs non-Hispanic white, at low income      | <0.001  | <0.001  |
| Mexican American vs non-Hispanic black, at low income      | 0.144   | 0.588   |
| non-Hispanic white vs non-Hispanic black, at low income    | <0.001  | <0.001  |
| Mexican American vs non-Hispanic white, at middle income   | <0.001  | <0.001  |
| Mexican American vs non-Hispanic black, at middle income   | 0.111   | 0.203   |
| non-Hispanic white vs non-Hispanic black, at middle income | <0.001  | <0.001  |
| Mexican American vs non-Hispanic white, at high income     | 0.060   | 0.155   |
| Mexican American vs non-Hispanic black, at high income     | 0.001   | 0.091   |
| non-Hispanic white vs non-Hispanic black, at high income   | <0.001  | <0.001  |

<sup>a</sup>We used analysis of covariance to examine the relations of various demographic parameters and survey cycle to log 10 transformed urinary concentrations of DCPs. The final regression model included the following significant predictors of both DCPs ( $P < 0.01$ ): age, survey period, and the interaction of race/ethnicity and family income. <sup>b</sup>Family income: Below poverty (poverty income ratio  $< 1$ ), Low (poverty income ratio: 1-1.93), Middle (poverty income ratio: 1.93-3.71), High (poverty income ratio  $> 3.71$ ).

**Supplemental Material Table S6.** Weighted distribution of the type of housing by race/ethnicity for NHANES 2003–2004 and 2005–2006.

| <b>Race/ethnicity</b>  | <b>Apartment</b> | <b>Attached family house</b> | <b>Mobile or dormitory</b> | <b>Single family house</b> |
|------------------------|------------------|------------------------------|----------------------------|----------------------------|
| Total (%)              | 14.53            | 6.97                         | 7.73                       | 70.76                      |
| Mexican American (%)   | 24.67            | 6.43                         | 8.37                       | 60.52                      |
| non-Hispanic white (%) | 11.05            | 5.77                         | 7.96                       | 75.22                      |
| non-Hispanic black (%) | 27.25            | 14.33                        | 5.95                       | 52.47                      |



**Supplemental Material Table S7.** Distribution of housing type by family income<sup>a</sup> and race for NHANES 2003–2004 and 2005–2006 cycles.

| <b>Race/ethnicity</b>  | <b>Apartment</b> | <b>Attached family house</b> | <b>Mobile or dormitory</b> | <b>Single family house</b> |
|------------------------|------------------|------------------------------|----------------------------|----------------------------|
| <b>Below poverty</b>   |                  |                              |                            |                            |
| Total (%)              | 26.21            | 10.44                        | 18.82                      | 44.53                      |
| Mexican American (%)   | 26.88            | 5.96                         | 13.82                      | 53.34                      |
| non-Hispanic white (%) | 22.04            | 8.52                         | 27.07                      | 42.37                      |
| non-Hispanic black (%) | 33.25            | 18.03                        | 8.18                       | 40.54                      |
| <b>Low</b>             |                  |                              |                            |                            |
| Total (%)              | 22.88            | 8.23                         | 10.89                      | 58                         |
| Mexican American (%)   | 32.69            | 8.15                         | 5.74                       | 53.42                      |
| non-Hispanic white (%) | 17.34            | 6.99                         | 13.15                      | 62.52                      |
| non-Hispanic black (%) | 34.27            | 12.69                        | 7.19                       | 45.84                      |
| <b>Middle</b>          |                  |                              |                            |                            |
| Total (%)              | 11.57            | 7.07                         | 6.86                       | 74.5                       |
| Mexican American (%)   | 17.99            | 7.32                         | 5.77                       | 68.91                      |
| non-Hispanic white (%) | 9.32             | 5.93                         | 7.18                       | 77.57                      |
| non-Hispanic black (%) | 22.2             | 14.58                        | 5.48                       | 57.75                      |
| <b>High</b>            |                  |                              |                            |                            |
| Total (%)              | 8.67             | 5.14                         | 3.14                       | 83.05                      |
| Mexican American (%)   | 11.09            | 1.27                         | 5.74                       | 81.9                       |
| non-Hispanic white (%) | 7.9              | 4.72                         | 3.13                       | 84.25                      |
| non-Hispanic black (%) | 17.11            | 11.66                        | 2.28                       | 68.94                      |

<sup>a</sup>Family income categories: Below poverty (poverty income ratio <1), Low (poverty income ratio: 1-1.93), Middle (poverty income ratio: 1.93-3.71), High (poverty income ratio >3.71).
